# Supplementary material for: Diagnostic Accuracy of the Artificial Intelligence Methods in Medical Imaging for Pulmonary Tuberculosis: A Systematic Review and Meta-Analysis
Source: MDPI journal article supplement (doi:10.3390/jcm12010303), 2022-12-30
Supplement: s1 [file s1]

## Supplementary Materials File S2

Embase <1974 to 2022 November> and Ovid MEDLINE(R) <1946 to November 2022>  
search through the OVID platform

| Step | Term(s)                                                                               |
|------|---------------------------------------------------------------------------------------|
| 1    | exp Tuberculosis/                                                                     |
| 2    | tuberculosis.mp.                                                                      |
| 3    | tuberculo*.mp.                                                                        |
| 4    | tb.mp.                                                                                |
| 5    | 1 or 2 or 3 or 4                                                                      |
| 6    | artificial intelligence.mp.                                                           |
| 7    | AI.mp.                                                                                |
| 8    | machine learning.mp.                                                                  |
| 9    | deep learning.mp.                                                                     |
| 10   | ml.mp.                                                                                |
| 11   | dl.mp.                                                                                |
| 12   | exp "Neural Networks (Computer)"/                                                     |
| 13   | convolutional.mp.                                                                     |
| 14   | cnn.mp.                                                                               |
| 15   | computer-assisted.mp.                                                                 |
| 16   | automated detection.mp.                                                               |
| 17   | automat*.mp.                                                                          |
| 18   | (computer* adj3 diagnosis).mp.                                                        |
| 19   | (computer* adj2 detection).mp.                                                        |
| 20   | (computer* adj2 screening).mp.                                                        |
| 21   | 6 or 7 or 8 or 9 or 10 or 11 or 12 or 13 or 14 or<br>15 or 16 or 17 or 18 or 19 or 20 |
| 22   | exp Tomography, X-Ray Computed/                                                       |
| 23   | exp Radiography/                                                                      |
| 24   | ct.mp.                                                                                |
| 25   | computed tomography.mp.                                                               |
| 26   | xray.mp.                                                                              |
| 27   | x-ray.mp.                                                                             |
| 28   | CXR.mp.                                                                               |
| 29   | radiograph*.mp.                                                                       |
| 30   | photograph*.mp.                                                                       |
| 31   | imag*.mp.                                                                             |
| 32   | 22 or 23 or 24 or 25 or 26 or 27 or 28 or 29 or<br>30 or 31                           |
| 33   | exp "Sensitivity and Specificity"/                                                    |
| 34   | exp roc curve/                                                                        |
| 35   | area under the curve.mp.                                                              |
| 36   | auc.mp.                                                                               |

|    |                                                       |
|----|-------------------------------------------------------|
| 37 | accurac*.mp.                                          |
| 38 | diagnostic accuracy.mp.                               |
| 39 | specificity.mp.                                       |
| 40 | sensitivity.mp.                                       |
| 41 | roc.mp.                                               |
| 42 | 33 or 34 or 35 or 36 or 37 or 38 or 39 or 40 or<br>41 |
| 43 | 5 and 21 and 32 and 42                                |

---
