# Supplementary material for: Diagnostic Accuracy of the Artificial Intelligence Methods in Medical Imaging for Pulmonary Tuberculosis: A Systematic Review and Meta-Analysis
Source: MDPI journal article supplement (doi:10.3390/jcm12010303), 2022-12-30
Supplement: s1 [file s1]

## Supplementary Materials

### Supplementary Materials S1

|                               | Risk of Bias      |            |                    |                 | Applicability Concerns |            |                    |
|-------------------------------|-------------------|------------|--------------------|-----------------|------------------------|------------|--------------------|
|                               | Patient Selection | Index Test | Reference Standard | Flow and Timing | Patient Selection      | Index Test | Reference Standard |
| A. Steiner 2015               | +                 | -          | -                  | +               | +                      | -          | -                  |
| Andrew J. Codlin 2021         | +                 | ?          | +                  | +               | +                      | +          | +                  |
| C. Young 2020                 | -                 | -          | -                  | -               | -                      | -          | -                  |
| Faiz Ahmad Khan 2020          | +                 | ?          | +                  | +               | +                      | +          | +                  |
| Jaime. Melendez 2018          | +                 | -          | -                  | ?               | -                      | +          | -                  |
| Jong Hyuk Lee 2020            | +                 | -          | +                  | +               | +                      | -          | +                  |
| Keelin Murphy 2020            | +                 | -          | +                  | -               | +                      | -          | +                  |
| Madlen nash 2020              | -                 | -          | +                  | -               | -                      | -          | +                  |
| Marianne Breuninger 2014      | +                 | -          | +                  | -               | +                      | +          | +                  |
| Monde Muyoyeta 2014           | -                 | +          | +                  | -               | +                      | +          | +                  |
| P . Maduskar 2013             | +                 | +          | +                  | +               | +                      | +          | +                  |
| Qinghua Liao 2022             | +                 | -          | +                  | +               | +                      | +          | +                  |
| R. C. Koesoemadinata 2018     | +                 | -          | +                  | +               | -                      | -          | +                  |
| R. H. H. M. Philipsen 2019    | +                 | +          | +                  | -               | +                      | +          | +                  |
| Shifa Salman Habib 2020       | +                 | ?          | +                  | +               | -                      | +          | +                  |
| Syed Mohammad Asad Zaidi 2018 | +                 | +          | -                  | -               | +                      | +          | -                  |
| Thiago Ramon Soares 2023      | +                 | +          | +                  | -               | +                      | +          | -                  |
| Zhi Zhen Qin 2019             | +                 | -          | +                  | +               | +                      | -          | +                  |
| Zhi Zhen Qin 2021             | +                 | -          | +                  | +               | +                      | -          | +                  |

High
 Unclear
 Low

Figure S1. Quality assessment (QUADAS 2) summary of clinical studies: risk of bias & applicability concerns.

|                                   | Risk of Bias      |            |                    |                 | Applicability Concerns |            |                    |
|-----------------------------------|-------------------|------------|--------------------|-----------------|------------------------|------------|--------------------|
|                                   | Patient Selection | Index Test | Reference Standard | Flow and Timing | Patient Selection      | Index Test | Reference Standard |
| Anshu Sharma 2021                 | ?                 | +          | +                  | +               | ?                      | +          | +                  |
| Arun Chauhan 2014                 | ?                 | +          | +                  | +               | ?                      | +          | +                  |
| Bao Feng 2020                     | +                 | ?          | +                  | ?               | +                      | ?          | +                  |
| Chenggong Yan 2021                | +                 | +          | +                  | +               | +                      | +          | +                  |
| Chirath Dasanayaka 2021           | ?                 | +          | +                  | +               | ?                      | +          | +                  |
| Dong Han 2021                     | +                 | +          | +                  | +               | +                      | +          | +                  |
| Eman Showkatian 2022              | ?                 | +          | +                  | +               | +                      | +          | +                  |
| Eui Jin Hwang 2019                | +                 | +          | +                  | ?               | +                      | +          | +                  |
| F. pasa 2019                      | ?                 | +          | +                  | +               | +                      | +          | +                  |
| Fábio S. Aguiar 2016              | +                 | +          | +                  | +               | +                      | +          | +                  |
| G. Simi Margarat 2022             | ?                 | ?          | +                  | +               | ?                      | ?          | +                  |
| Jaime Melendez 2015               | +                 | +          | +                  | +               | ?                      | +          | +                  |
| Kai Zhang 2021                    | +                 | +          | +                  | +               | ?                      | +          | +                  |
| Laurens Hogeweg 2015              | +                 | +          | +                  | +               | +                      | +          | +                  |
| Le An 2022                        | ?                 | ?          | ?                  | +               | ?                      | ?          | +                  |
| Li Wang 2021                      | +                 | ?          | +                  | +               | +                      | ?          | +                  |
| Luyao Ma 2020                     | ?                 | +          | +                  | +               | ?                      | +          | +                  |
| M.P . Rajakumar 2021              | ?                 | +          | +                  | +               | +                      | +          | +                  |
| Manohar Karki 2021                | ?                 | ?          | +                  | ?               | ?                      | ?          | +                  |
| Michail Mamalakis 2021            | ?                 | ?          | +                  | +               | ?                      | ?          | +                  |
| Mustapha Oloko-Oba 2021           | ?                 | +          | +                  | +               | +                      | +          | +                  |
| Omar Faruk 2021                   | ?                 | +          | ?                  | ?               | ?                      | +          | +                  |
| Paras Lakhani 2017                | ?                 | +          | +                  | +               | ?                      | +          | +                  |
| Pranav Rajpurkar 2020             | +                 | +          | +                  | +               | +                      | +          | +                  |
| Rui Shen 2010                     | +                 | +          | +                  | +               | +                      | +          | +                  |
| Sahar Kazemzadeh 2023             | ?                 | +          | +                  | +               | ?                      | +          | +                  |
| Satyavrat Govindarajan 2021       | ?                 | +          | +                  | +               | ?                      | +          | +                  |
| Seifedine Kadry 2022              | ?                 | +          | +                  | +               | ?                      | +          | +                  |
| Seok-Jae Heo 2019                 | ?                 | +          | +                  | ?               | +                      | +          | +                  |
| Seowoo Lee 2021                   | +                 | +          | +                  | +               | +                      | +          | +                  |
| Sivaramakrishnan Rajaraman 2021   | ?                 | ?          | +                  | +               | ?                      | ?          | +                  |
| Stefan Jaeger 2014                | ?                 | +          | +                  | +               | ?                      | +          | +                  |
| Tae Kyung Kim 2020                | ?                 | ?          | +                  | +               | ?                      | ?          | +                  |
| Toktam Khatibi 2021               | ?                 | ?          | ?                  | ?               | ?                      | ?          | +                  |
| Vasundhara Acharya 2022           | +                 | +          | +                  | +               | ?                      | +          | +                  |
| Wen Zhou 2022                     | ?                 | ?          | +                  | +               | ?                      | ?          | +                  |
| Yilin Xie 2020                    | ?                 | +          | +                  | +               | ?                      | +          | +                  |
| Yulia ArzhaevaYulia Arzhaeva 2009 | +                 | +          | +                  | +               | +                      | +          | +                  |

High
Unclear
Low

Figure S2. Quality assessment (QUADAS 2) summary of development studies: Risk of bias and applicability concerns.

\* We excluded three sets of data (Lee 2020, Liao 2022, Muyoyeta 2014) for which sensitivity analysis could not be performed.

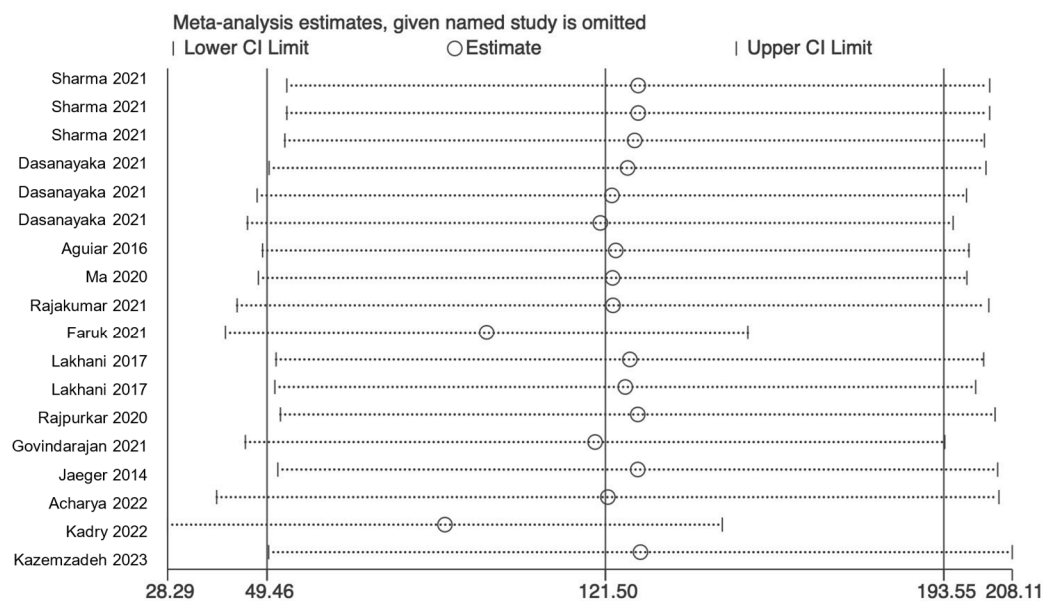

**Figure S4. Sensitivity analysis of development studies.**

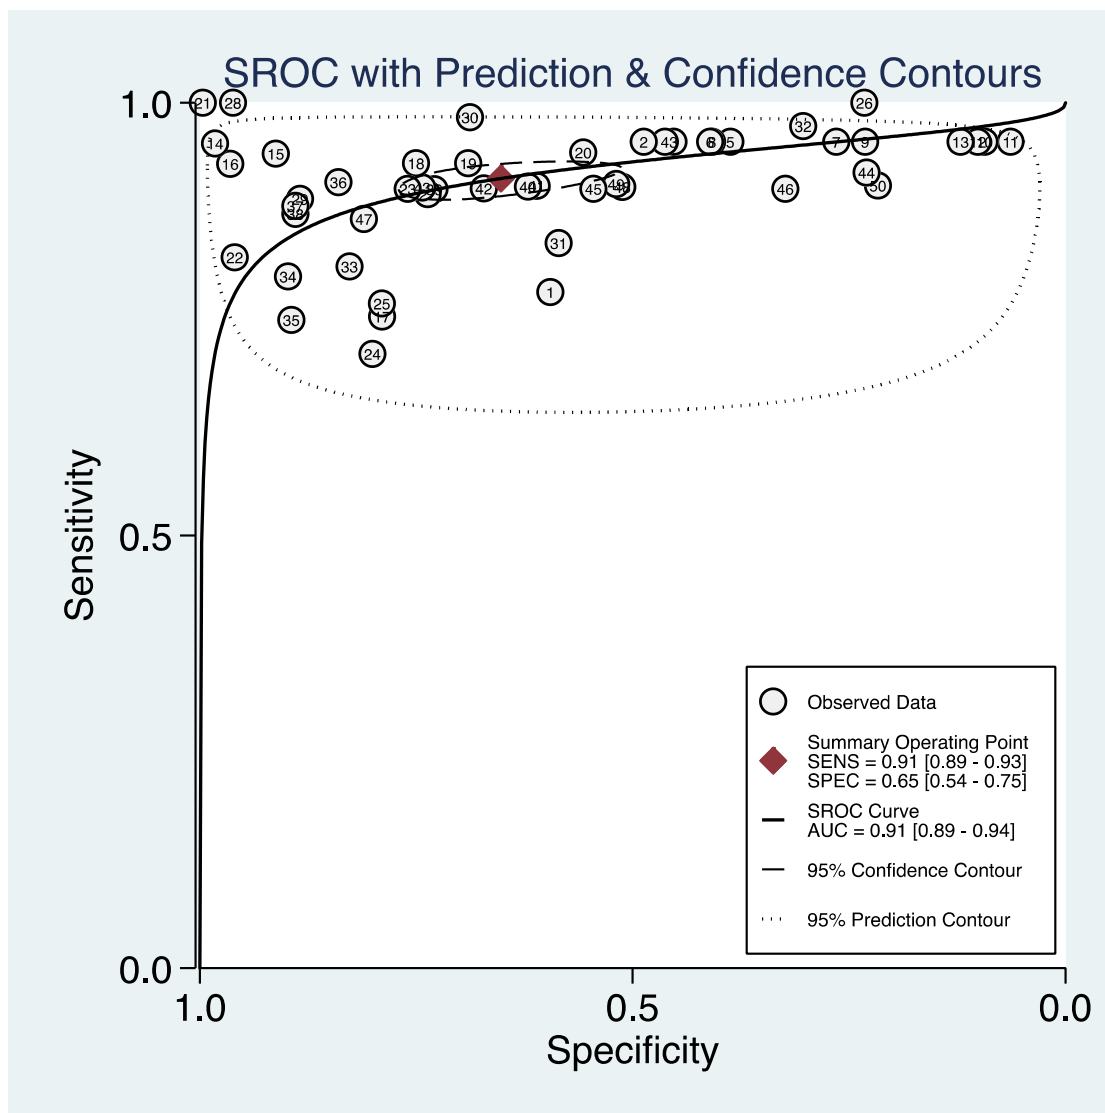

Figure S5. Summary receiver operating characteristic (SROC) curve of clinical studies.

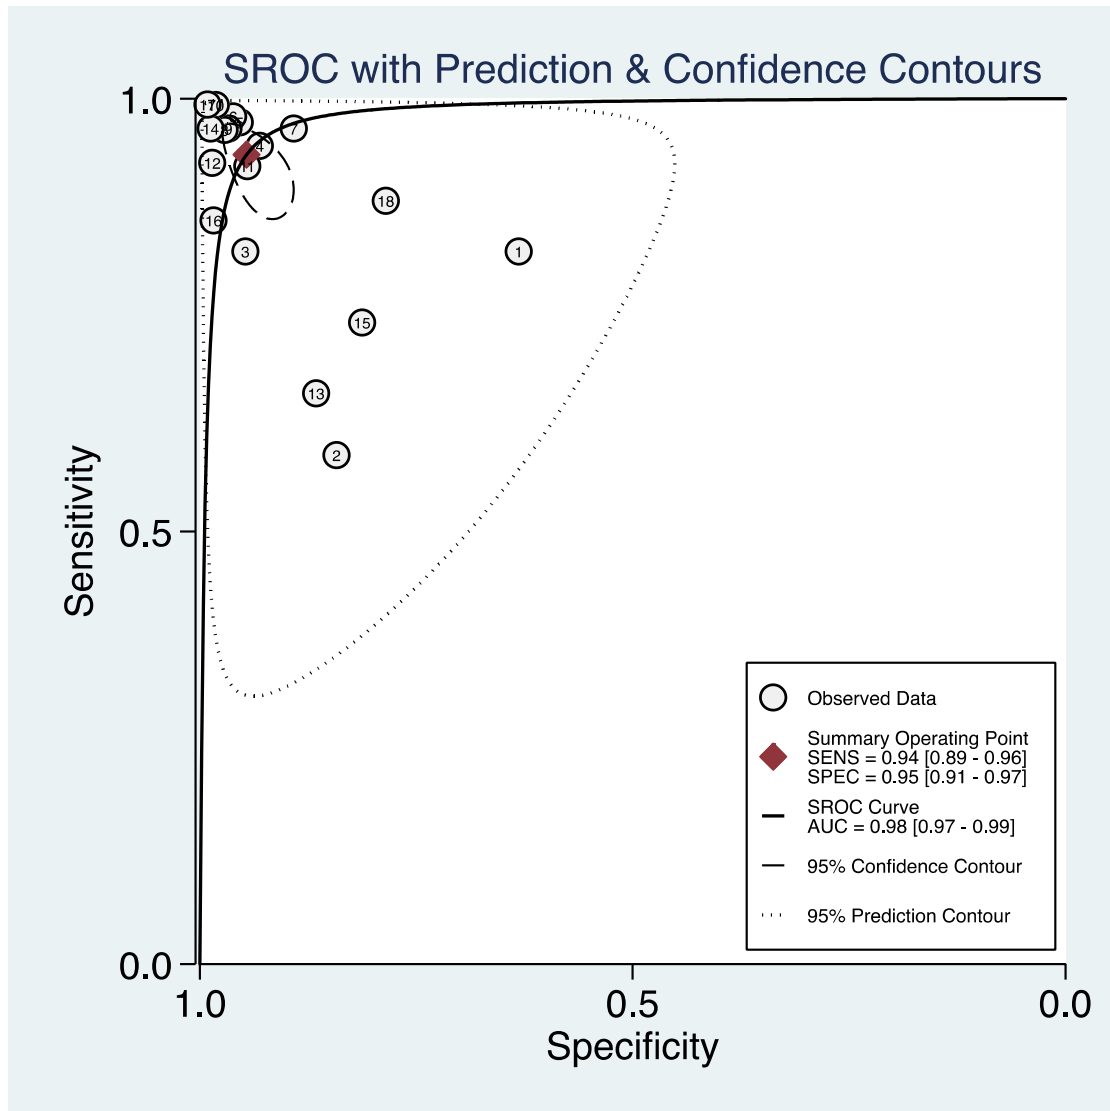

Figure S6. Summary receiver operating characteristic (SROC) curve of development studies.

**Table S1. Demographics of clinical studies.**

| First author, year         | Country                                   | All   | Sex         |            | Average age | Previous TB |             | HIV            |                |
|----------------------------|-------------------------------------------|-------|-------------|------------|-------------|-------------|-------------|----------------|----------------|
|                            |                                           |       | Male (%)    | Female (%) |             | Yes N (%)   | No N (%)    | Positive N (%) | Negative N (%) |
| Deep learning              |                                           |       |             |            |             |             |             |                |                |
| Qin et al, 2019            | Nepal, Cameroon                           | 1196  | 550 (46)    | 646 (54)   | 46          | NR          | NR          | 38 (3)         | 271 (23)       |
| Murphy et al, 2020         | Pakistan                                  | 5565  | 2756 (50)   | 2809 (50)  | NR          | NR          | NR          | NR             | NR             |
| Nash et al, 2020           | India                                     | 929   | 647 (70)    | 282 (30)   | 51.9        | 138 (15)    | NR          | 47 (5)         | NR             |
| Soares et al, 2023         | Brazil                                    | 2075  | NR          | NR         | 33          | 293         | NR          | NR             | NR             |
| Qin et al, 2021            | Bangladesh                                | 23954 | 16078 (67)  | 7876 (33)  | 42          | 3586 (15)   | NR          | NR             | NR             |
| Khan et al, 2020           | Pakistan                                  | 2198  | 1148 (52)   | 1050 (48)  | NR          | 499 (23)    | NR          | NR             | 2187 (99)      |
| Liao et al, 2022           | China                                     | 2543  | 1073 (42)   | 1470 (58)  | NR          | 8 (0.3)     | 2535 (99.7) | NR             | NR             |
| Codlin et al, 2021         | Vietnam                                   | 1032  | 712 (69)    | 320 (31)   | 62          | NR          | NR          | 2 (0.2)        | NR             |
| Lee et al, 2020            | South Korea                               | 20135 | 20135 (100) | 0 (0)      | NR          | NR          | NR          | NR             | NR             |
| Gelaw et al, 2022          | Africa, Asia, Middle East, Eastern Europe | 1769  | 1071 (61)   | 698 (39)   | NR          | 251 (14)    | 1518 (86)   | 18 (1)         | NR             |
| Ehrlich et al, 2022        | South Africa                              | 501   | NR          | NR         | NR          | NR          | NR          | NR             | NR             |
| Kagujje et al, 2022        | Zambia                                    | 1884  | 1184 (63)   | 700 (37)   | 38          | 452 (24)    | 1432 (76)   | 702 (37)       | 1073 (57)      |
| Tavaziva et al, 2020       | Pakistan                                  | 2190  | 1144 (52)   | 1046 (48)  | 33          | 495 (23)    | 1692 (77)   | NR             | NR             |
| Machine learning           |                                           |       |             |            |             |             |             |                |                |
| Maduskar et al, 2013       | WHO TB Specimen Bank                      | 161   | 42 (26)     | 119 (74)   | 35.8±9.6    | NR          | NR          | 110 (68)       | NR             |
| Muyoyeta et al, 2014       | Zambia                                    | 350   | 215 (61)    | 135 (39)   | 36.5        | 78 (22)     | 272 (78)    | 190 (54)       | 148 (42)       |
| Steiner et al, 2015        | Tanzanian                                 | 511   | 511 (100)   | 0 (0)      | 37          | NR          | NR          | 58 (11)        | 402 (79)       |
| Melendez et al, 2018       | UK                                        | 39328 | 39328 (100) | 0 (0)      | NR          | NR          | NR          | NR             | NR             |
| Zaidi et al, 2018          | Pakistan                                  | 6090  | 3018 (50)   | 3072 (50)  | NR          | NR          | NR          | NR             | NR             |
| Philipsen et al, 2019      | Philippines                               | 10755 | NR          | NR         | NR          | NR          | NR          | NR             | NR             |
| Breuninger et al, 2014     | Tanzania                                  | 861   | 428 (50)    | 433 (50)   | 42          | 144 (17)    | 717 (83)    | 379 (44)       | 478 (56)       |
| Habib et al, 2020          | Pakistan                                  | 694   | 374 (54)    | 320 (46)   | 54          | 74 (11)     | 620 (89)    | NR             | NR             |
| Koesoemadinata et al, 2018 | Indonesia                                 | 794   | 291 (37)    | 503 (63)   | NR          | 82 (10)     | 712 (90)    | 2 (0.3)        | 3 (0.4)        |
| Not reported               |                                           |       |             |            |             |             |             |                |                |
| Young et al, 2020          | MHSC, MBOD                                | 142   | 142 (100)   | 0 (0)      | NR          | NR          | NR          | NR             | NR             |

Abbreviation: TB, tuberculosis; HIV, human immunodeficiency virus; NR, not reported; WHO, world health organization; UK, United Kingdom; MHSC, mine health and safety council; MBOD, medical bureau for occupational diseases.

Table S2. Accuracy information of clinical studies included.

| First author, year | Imaging modality | Software                                                                                                                                                                                                                                              | Threshold                                                                                                                                                                                                                                                                                                              | Reference standard                      | AUC                                                                                                                                                                                                                                                                                                                                       | TP                                                                                      | FP                                                                               | FN                                                            | TN                                                                            | Sensitivity                                                                                                                                                                                                                                                                                                                                | Specificity                                                                                                                                                                                                                                                                                                                              |
|--------------------|------------------|-------------------------------------------------------------------------------------------------------------------------------------------------------------------------------------------------------------------------------------------------------|------------------------------------------------------------------------------------------------------------------------------------------------------------------------------------------------------------------------------------------------------------------------------------------------------------------------|-----------------------------------------|-------------------------------------------------------------------------------------------------------------------------------------------------------------------------------------------------------------------------------------------------------------------------------------------------------------------------------------------|-----------------------------------------------------------------------------------------|----------------------------------------------------------------------------------|---------------------------------------------------------------|-------------------------------------------------------------------------------|--------------------------------------------------------------------------------------------------------------------------------------------------------------------------------------------------------------------------------------------------------------------------------------------------------------------------------------------|------------------------------------------------------------------------------------------------------------------------------------------------------------------------------------------------------------------------------------------------------------------------------------------------------------------------------------------|
| Deep learning      |                  |                                                                                                                                                                                                                                                       |                                                                                                                                                                                                                                                                                                                        |                                         |                                                                                                                                                                                                                                                                                                                                           |                                                                                         |                                                                                  |                                                               |                                                                               |                                                                                                                                                                                                                                                                                                                                            |                                                                                                                                                                                                                                                                                                                                          |
| Qin et al, 2019    | CXR              | CAD4TB (v 6),<br>qXR (v 2),<br>Lunit INSIGHT CXR(v 4.7.2)                                                                                                                                                                                             | 63(CAD4TB (v 6)),<br>0.67(qXR(v 2)),<br>0.92(Lunit INSIGHT CXR (v 4.7.2))                                                                                                                                                                                                                                              | Xpert MTB/RIF                           | 0.920(CAD4TB (v 6)),<br>0.940(qXR(v 2)),<br>0.940(Lunit INSIGHT CXR (v 4.7.2))                                                                                                                                                                                                                                                            | 99<br>96<br>95                                                                          | 174<br>120<br>120                                                                | 10<br>13<br>14                                                | 913<br>967<br>967                                                             | 0.910(CAD4TB (v 6)),<br>0.880(qXR(v 2)),<br>0.870(Lunit INSIGHT (v 4.7.2))                                                                                                                                                                                                                                                                 | 0.840(CAD4TB (v 6)),<br>0.890(qXR(v 2)),<br>0.890(Lunit INSIGHT CXR (v 4.7.2))                                                                                                                                                                                                                                                           |
| Murphy et al, 2020 | CXR              | CAD4TB (v 6)                                                                                                                                                                                                                                          | NR                                                                                                                                                                                                                                                                                                                     | Xpert MTB/RIF                           | 0.885                                                                                                                                                                                                                                                                                                                                     | 769                                                                                     | 1131                                                                             | 85                                                            | 3580                                                                          | 0.900                                                                                                                                                                                                                                                                                                                                      | 0.760                                                                                                                                                                                                                                                                                                                                    |
| Nash et al, 2020   | CXR              | qXR (v 2)                                                                                                                                                                                                                                             | 0.818                                                                                                                                                                                                                                                                                                                  | AFB smear, Xpert MTB/RIF or MTB culture | 0.810                                                                                                                                                                                                                                                                                                                                     | 225                                                                                     | 122                                                                              | 92                                                            | 490                                                                           | 0.710                                                                                                                                                                                                                                                                                                                                      | 0.800                                                                                                                                                                                                                                                                                                                                    |
| Soares et al, 2023 | CXR              | CAD4TB (v 6),<br>Lunit INSIGHT CXR (v 3.1.0.0),<br>qXR (v 3)                                                                                                                                                                                          | 60(CAD4TB (v 6)),<br>0.72(Lunit INSIGHT CXR (v 3.1.0.0)),<br>0.5(qXR (v 3))                                                                                                                                                                                                                                            | Xpert MTB/RIF, MTB culture              | 0.877(CAD4TB (v 6)),<br>0.912(Lunit INSIGHT CXR (v 3.1.0.0)),<br>0.901(qXR (v3))                                                                                                                                                                                                                                                          | 210<br>207<br>194                                                                       | 314<br>185<br>192                                                                | 49<br>52<br>65                                                | 1502<br>1631<br>1624                                                          | 0.807(CAD4TB (v 6)),<br>0.799(Lunit INSIGHT CXR (v 3.1.0.0)),<br>0.745(qXR (v3))                                                                                                                                                                                                                                                           | 0.827(CAD4TB (v 6)),<br>0.898(Lunit INSIGHT CXR (v 3.1.0.0)),<br>0.894(qXR (v3))                                                                                                                                                                                                                                                         |
| Qin et al, 2021    | CXR              | CAD4TB (v 7),<br>InferRead DR (v 2),<br>Lunit INSIGHT CXR (v 4.9.0),<br>JF CXR-1 (v 2),<br>qXR (v 3)                                                                                                                                                  | 50(CAD4TB (v 7)),<br>0.34(InferRead DR (v 2)),<br>0.92(Lunit INSIGHT CXR (v 4.9.0)),<br>0.6(JF CXR-1 (v 2)),<br>0.6(qXR (v 3))                                                                                                                                                                                         | Xpert MTB/RIF                           | 0.903(CAD4TB (v 7)),<br>0.849(InferRead DR (v 2)),<br>0.849(Lunit INSIGHT CXR (v 4.9.0)),<br>0.886(JF CXR-1 (v 2)),<br>0.908(qXR (v 3))                                                                                                                                                                                                   | 3308<br>3319<br>3322<br>3311<br>3315                                                    | 5496<br>7686<br>7889<br>6652<br>5212                                             | 3671<br>3561<br>3531<br>3641<br>3601                          | 14783<br>12593<br>12390<br>13627<br>15067                                     | 0.900(CAD4TB (v 7)),<br>0.903(InferRead DR (v 2)),<br>0.904(Lunit INSIGHT CXR (v 4.9.0)),<br>0.901(JF CXR-1 (v 2)),<br>0.902(qXR (v 3))                                                                                                                                                                                                    | 0.729(CAD4TB (v 7)),<br>0.621(InferRead DR (v 2)),<br>0.611(Lunit INSIGHT CXR (v 4.9.0)),<br>0.672(JF CXR-1 (v 2)),<br>0.743(qXR (v 3))                                                                                                                                                                                                  |
| Khan et al, 2020   | CXR              | qXR (v 2),<br>CAD4TB (v 6)                                                                                                                                                                                                                            | 0.49(qXR (v 2)),<br>NR (CAD4TB (v 6))                                                                                                                                                                                                                                                                                  | MTB culture                             | NR<br>NR                                                                                                                                                                                                                                                                                                                                  | 253<br>253                                                                              | 481<br>597                                                                       | 19<br>19                                                      | 1445<br>1329                                                                  | 0.930(qXR (v 2)),<br>0.930(CAD4TB (v 6))                                                                                                                                                                                                                                                                                                   | 0.750(qXR (v 2)),<br>0.690(CAD4TB (v 6))                                                                                                                                                                                                                                                                                                 |
| Liao et al, 2022   | CXR              | JF CXR-1 (v 2)                                                                                                                                                                                                                                        | 30                                                                                                                                                                                                                                                                                                                     | Human reader                            | 0.987                                                                                                                                                                                                                                                                                                                                     | 8                                                                                       | 97                                                                               | 0                                                             | 2438                                                                          | 1.000                                                                                                                                                                                                                                                                                                                                      | 0.957                                                                                                                                                                                                                                                                                                                                    |
| Codlin et al, 2021 | CXR              | qXR (v 3),<br>CAD4TB (v 7),<br>Genki (v 2),<br>Lunit INSIGHT CXR (v 3.1.0.0),<br>JF CXR-1 (v 3.0),<br>InferRead DR<br>Chest (v 1.0.0.0),<br>ChestEye (v 1),<br>T-Xnet (v 1),<br>XrayAME (v 1),<br>COTO (v 1),<br>SemanticMD (v 1),<br>Dr CADx (v 0.1) | 44.1(qXR (v 3)),<br>31.1(CAD4TB (v 7)),<br>46.7(Genki (v 2)),<br>3(Lunit INSIGHT CXR (v 3.1.0.0)),<br>83.4(JF CXR-1 (v 3.0)),<br>53.8(InferRead DR<br>Chest (v 1.0.0.0)),<br>15.4(ChestEye (v 1)),<br>1.2(T-Xnet (v 1)),<br>0.6(XrayAME (v 1)),<br>1.5(COTO (v 1)),<br>0.4(SemanticMD (v 1)),<br>27.8(Dr CADx (v 0.1)) | Xpert MTB/RIF                           | 0.820(qXR (v 3)),<br>0.820(CAD4TB (v 7)),<br>0.780(Genki (v 2)),<br>0.820(Lunit INSIGHT CXR (v 3.1.0.0)),<br>0.770(JF CXR-1 (v 3.0)),<br>0.760(InferRead DR<br>Chest (v 1.0.0.0)),<br>0.730(ChestEye (v 1)),<br>0.700(T-Xnet (v 1)),<br>0.660(XrayAME (v 1)),<br>0.660(COTO (v 1)),<br>0.530(SemanticMD (v 1)),<br>0.500(Dr CADx (v 0.1)) | 127<br>127<br>127<br>127<br>127<br>127<br>127<br>127<br>127<br>127<br>127<br>127<br>127 | 461<br>492<br>483<br>551<br>530<br>661<br>532<br>691<br>815<br>842<br>808<br>790 | 6<br>6<br>6<br>6<br>6<br>6<br>6<br>6<br>6<br>6<br>6<br>6<br>6 | 438<br>407<br>416<br>348<br>369<br>238<br>367<br>208<br>84<br>57<br>91<br>109 | 0.955(qXR (v 3)),<br>0.955(CAD4TB (v 7)),<br>0.955(Genki (v 2)),<br>0.955 (Lunit INSIGHT CXR (v 3.1.0.0)),<br>0.955(JF CXR-1 (v 3.0)),<br>0.955(InferRead DR<br>Chest (v 1.0.0.0)),<br>0.955(ChestEye (v 1)),<br>0.955(T-Xnet (v 1)),<br>0.955(XrayAME (v 1)),<br>0.955(COTO (v 1)),<br>0.955(SemanticMD (v 1)),<br>0.955(Dr CADx (v 0.1)) | 0.450(qXR (v 3)),<br>0.453(CAD4TB (v 7)),<br>0.463(Genki (v 2)),<br>0.387(Lunit INSIGHT CXR (v 3.1.0.0)),<br>0.410(JF CXR-1 (v 3.0)),<br>0.265(InferRead DR<br>Chest (v1.0.0.0)),<br>0.408(ChestEye (v 1)),<br>0.231(T-Xnet (v 1)),<br>0.093(XrayAME (v 1)),<br>0.063(COTO (v 1)),<br>0.101(SemanticMD (v 1)),<br>0.121(Dr CADx (v 0.1)) |



|                            |     |                                                              |                                                                             |                                                                    |                                         |                      |                   |                   |                      |                                                                                  |                                                                                 |
|----------------------------|-----|--------------------------------------------------------------|-----------------------------------------------------------------------------|--------------------------------------------------------------------|-----------------------------------------|----------------------|-------------------|-------------------|----------------------|----------------------------------------------------------------------------------|---------------------------------------------------------------------------------|
| Lee et al, 2020            | CXR | Lunit INSIGHT CXR (v 4.7.2)                                  | 0.46, 0.16                                                                  | MTB culture, AFB smear, TB polymerase chain reaction, human reader | 1.000, 0.967                            | 5<br>23              | 69<br>809         | 0<br>5            | 20061<br>19298       | 1.000, 0.821                                                                     | 0.997, 0.960                                                                    |
| Gelaw et al, 2022          | CXR | CAD4TB (v 6),<br>Lunit INSIGHT CXR (v 4.9.0.0),<br>qXR (v 2) | 46(CAD4TB (v 6))<br>0.076(Lunit INSIGHT CXR (v 4.9.0.0))<br>0.29(qXR (v 2)) | Xpert MTB/RIF,<br>Mycobacterium tuberculosis (MTB) culture         | NR                                      | 490<br>480<br>480    | 952<br>562<br>836 | 43<br>53<br>53    | 284<br>674<br>400    | 0.902 (CAD4TB (v 6))<br>0.901(Lunit INSIGHT CXR (v 4.9.0.0))<br>0.901(qXR (v 2)) | 0.230(CAD4TB (v 6))<br>0.545(Lunit INSIGHT CXR (v 4.9.0.0))<br>0.324(qXR (v 2)) |
| Ehrlich et al, 2022        | CXR | CAD4TB (v 7)                                                 | NR                                                                          | Human reader                                                       | 0.889                                   | 187                  | 54                | 29                | 231                  | 0.867                                                                            | 0.812                                                                           |
| Kagujje et al, 2022        | CXR | CAD4TB (v 7),<br>qXR (v 3)                                   | 17(CAD4TB (v 7))<br>6(qXR (v 3))                                            | Xpert MTB/RIF                                                      | 0.850(CAD4TB (v 7))<br>0.860(qXR (v 3)) | 269<br>270           | 774<br>763        | 29<br>28          | 812<br>823           | 0.903 (CAD4TB (v 7))<br>0.906(qXR (v 3))                                         | 0.512(CAD4TB (v 7))<br>0.519(qXR (v 3))                                         |
| Tavaziva et al, 2022       | CXR | Lunit INSIGHT CXR (v 3.1.0.0)                                | 30                                                                          | Xpert MTB/RIF,<br>Mycobacterium tuberculosis (MTB) culture         | 0.850                                   | 189                  | 47                | 20                | 13                   | 0.877                                                                            | 0.643                                                                           |
| Machine learning           |     |                                                              |                                                                             |                                                                    |                                         |                      |                   |                   |                      |                                                                                  |                                                                                 |
| Maduskar et al, 2013       | CXR | CAD4TB (v 1.08)                                              | 50                                                                          | AFB smear, MTB culture                                             | 0.730                                   | 110                  | 10                | 13                | 28                   | 0.880                                                                            | 0.410                                                                           |
| Muyoyeta et al, 2014       | CXR | CAD4TB (v 1.08)                                              | 60                                                                          | Xpert MTB/RIF, human reader                                        | 0.710                                   | 96                   | 195               | 0                 | 59                   | 1.000                                                                            | 0.232                                                                           |
| Steiner et al, 2015        | CXR | CAD4TB (v 3.07)                                              | 70                                                                          | Human reader                                                       | 0.750                                   | 50                   | 181               | 14                | 266                  | 0.783                                                                            | 0.594                                                                           |
| Zaidi et al, 2018          | CXR | CAD4TB (v 3.07)                                              | 50                                                                          | Xpert MTB/RIF                                                      | 0.790                                   | 900                  | 3600              | 25                | 1565                 | 0.973                                                                            | 0.303                                                                           |
| Breuninger et al, 2014     | CXR | CAD4TB (v 3.07)                                              | 74                                                                          | AFB smear, MTB culture                                             | NR                                      | 149                  | 49                | 45                | 184                  | 0.770                                                                            | 0.790                                                                           |
| Habib et al, 2020          | CXR | CAD4TB (v 3.07)                                              | 60                                                                          | Xpert MTB/RIF                                                      | 0.780                                   | 62                   | 257               | 12                | 363                  | 0.840                                                                            | 0.586                                                                           |
| Melendez et al, 2018       | CXR | CAD4TB (v 5)                                                 | 39.8                                                                        | Human reader                                                       | 0.900                                   | 82                   | 17218             | 5                 | 21656                | 0.950                                                                            | 0.560                                                                           |
| Philipsen et al, 2019      | CXR | CAD4TB (v 5)                                                 | 60                                                                          | Xpert MTB/RIF, human reader                                        | 0.930                                   | 293                  | 3263              | 5                 | 7194                 | 0.980                                                                            | 0.690                                                                           |
| Koesoemadinata et al, 2018 | CXR | CAD4TB (v 5)                                                 | 65                                                                          | Composite reference standard(s)                                    | 0.890                                   | 8                    | 39                | 1                 | 298                  | 0.889                                                                            | 0.884                                                                           |
| Not reported               |     |                                                              |                                                                             |                                                                    |                                         |                      |                   |                   |                      |                                                                                  |                                                                                 |
| Young et al, 2020          | CXR | Not named                                                    | NR                                                                          | Human reader                                                       | 0.989,<br>0.963,<br>0.980,<br>0.768     | 81<br>80<br>79<br>64 | 1<br>5<br>2<br>12 | 4<br>5<br>6<br>21 | 56<br>52<br>55<br>45 | 0.953,<br>0.941,<br>0.929,<br>0.753                                              | 0.982,<br>0.912,<br>0.965,<br>0.789                                             |

Abbreviation: CXR, chest X-ray; CT, computed tomography; AFB, acid fast bacilli; AUC, area under the receiver operating curve; TP, true positive; FP, false positive; FN, false negative; TN, true negative; MTB, Mycobacterium tuberculosis; NR, not reported.

**Table S3. Accuracy measures reported by development studies.**

| First author,<br>year | Model                   | Imaging<br>modality | Database used                                                        | training<br>set | Type of internal<br>validation     | External<br>validation (Yes<br>or No) | Test set                                    | Reference standard                       |
|-----------------------|-------------------------|---------------------|----------------------------------------------------------------------|-----------------|------------------------------------|---------------------------------------|---------------------------------------------|------------------------------------------|
| Pasa et al, 2019      | CNN                     | CXR                 | MC, CH, Belarus                                                      | 1523            | 5-fold cross-validation            | No                                    | 381                                         | Human reader                             |
| Xie et al, 2020       | RCNN                    | CXR                 | JSRT, MC, CH, FANXJU                                                 | 5184            | 5-fold cross-validation            | No                                    | NR                                          | Human reader                             |
| Ma et al, 2020        | U-Net                   | CT                  | Hebei                                                                | 567             | NR                                 | No                                    | 279                                         | Sputum smear                             |
| Rajpurkar et al, 2020 | DenseNet                | CXR                 | Jooste/Khayelitsha                                                   | 563             | 5-fold cross-validation            | No                                    | 114                                         | Xpert MTB/RIF, MTB culture               |
| Oloko-Oba et al, 2021 | EfficientNets           | CXR                 | MC, CH                                                               | 595             | NR                                 | No                                    | 201                                         | Human reader                             |
| Mamalakos et al, 2021 | DenseNet-121, ResNet-50 | CXR                 | Pediatric CXRs dataset, IEEE COVID-19 CXRs dataset, CH               | 1009            | Monte Carlo cross validation split | No                                    | 303                                         | Human reader                             |
| Rajakumar et al, 2021 | VGG16, VGG19, KNN       | CXR                 | MC, CH, NLM, RSNA                                                    | 4000            | 5-fold cross-validation            | No                                    | NR                                          | Human reader                             |
| Wang et al, 2021      | 3D-ResNet               | CT                  | Tianjin, Xi'an                                                       | 886             | Hold-out method                    | Yes                                   | 106                                         | AFB smear, MTB culture                   |
| Showkatie et al, 2022 | ConvNet                 | CXR                 | MC, CH                                                               | 2040            | random split                       | No                                    | 120                                         | Human reader                             |
| Zhou et al, 2022      | ResNet                  | CXR                 | CHNCXR, MCUCXR, China                                                | 5045            | NR                                 | Yes                                   | 1349                                        | Human reader                             |
| Rajaraman et al, 2021 | ImageNet, VGG-16        | CXR                 | CH, MC                                                               | 384             | 4-fold cross-validation            | No                                    | NR                                          | Human reader                             |
| Yan et al, 2021       | SeNet-ResNet-18         | CT                  | NH, YH, HH, NIH                                                      | 714             | Hold-out method                    | Yes                                   | 99/86/171(NH, YH), 86(NH, HH), 171(NH, NIH) | Human reader                             |
| Zhang et al, 2021     | CBIR-CSNN               | CT                  | Liaoning                                                             | 2356            | Hold-out method                    | Yes                                   | 300                                         | Composite reference standard(s)          |
| Lakhani et al, 2017   | AlexNet, GoogLeNet      | CXR                 | MC, CH, Belarus, Thomas Jefferson University Hospital                | 1370            | random split                       | No                                    | 300                                         | Human reader                             |
| Han et al, 2021       | VGG16                   | CXR                 | China                                                                | 1992            | random split                       | No                                    | 796                                         | Human reader                             |
| An et al, 2022        | E-TBNet (ResNet)        | CXR                 | MC, CH                                                               | 111             | Hold-out method                    | No                                    | 27                                          | Human reader                             |
| Lee et al, 2021       | EfficientNet            | CXR                 | Korean hospitals                                                     | 6883            | Hold-out method                    | No                                    | 3922                                        | Xpert MTB/RIF, MTB culture, Human reader |
| Khatibi et al, 2021   | CNN, CCNSE              | CXR                 | MC, CH                                                               | 753             | 5-fold cross-validation            | No                                    | NR                                          | Human reader                             |
| Kim et al, 2020       | DCNN                    | CXR                 | NIH CXR, NIH CXR, MC, SZ, Johns Hopkins Hospital, Baltimore, MD, USA | 111622          | Hold-out method                    | Yes                                   | 1800                                        | Human reader                             |

|                          |                                                       |     |                                                             |        |                          |     |       |                                                                       |
|--------------------------|-------------------------------------------------------|-----|-------------------------------------------------------------|--------|--------------------------|-----|-------|-----------------------------------------------------------------------|
| Feng et al, 2020         | CNN                                                   | CT  | China                                                       | 218    | random split             | Yes | NR    | Composite reference standard(s)                                       |
| Hwang et al, 2019        | CNN                                                   | CXR | Seoul National University Hospital, Korea                   | 60089  | random split             | Yes | 450   | Human reader                                                          |
| Heo et al, 2019          | I-CNN (VGG19), D-CNN (VGG19)                          | CXR | Yonsei University, Korea                                    | 4000   | random split             | No  | 75354 | Human reader                                                          |
| Aguiar et al, 2016       | MLP                                                   | CXR | CFFH of the Federal University of Rio de Janeiro            | 216    | Hold-out method          | No  | NR    | Human reader                                                          |
| Faruk et al, 2021        | Xception, InceptionV3, InceptionResNetV2, MobileNetV2 | CT  | Tuberculosis Chest X-ray Database                           | 19600  | Hold-out method          | No  | 2800  | Human reader                                                          |
| Karki et al, 2021        | InceptionV3, Xception                                 | CXR | TB Portals, MC, CH, TBX11K large scale tuberculosis dataset | 11284  | 10-fold cross-validation | No  | NR    | Human reader                                                          |
| Dasanayaka et al, 2021   | VGG16, InceptionV3, Ensemble                          | CXR | MC, CH, MIMIC database                                      | 6648   | Hold-out method          | No  | 831   | Human reader                                                          |
| Shen et al, 2010         | Bayesian classifier                                   | CXR | Canada                                                      | 18     | NR                       | No  | 131   | Human reader                                                          |
| Melendez et al, 2015     | si-miSVM+PEDD                                         | CXR | Zambia, Tanzania, the Gambia                                | 1323   | NR                       | No  | 1313  | Human reader                                                          |
| Sharma et al, 2021       | Tree, SVM, Naïve Bayes                                | CXR | India                                                       | 2400   | NR                       | No  | 600   | Composite reference standard(s)                                       |
| Arzhaeva et al, 2009     | MVDB                                                  | CXR | NR (high population)                                        | 217    | NR                       | No  | 165   | Human reader                                                          |
| Jaeger et al, 2014       | SVM                                                   | CXR | MC                                                          | 138    | NR                       | No  | NR    | Human reader                                                          |
| Chauhan et al, 2014      | SVM                                                   | CXR | India                                                       | 408    | 5-fold cross-validation  | No  | 204   | Human reader                                                          |
| Hogeweg et al, 2015      | RF50, GB50, LDA, KNN13                                | CXR | Find & Treat, TB-NEAT                                       | 800    | 10-fold cross-validation | No  | NR    | MTB culture, human reader                                             |
| Govindarajan et al, 2021 | ELM, OSELM                                            | CXR | MC                                                          | 276    | 10-fold cross-validation | No  | NR    | Human reader                                                          |
| Acharya et al, 2022      | ImageNet fine-tuned Normalization-Free Networks       | CXR | Tuberculosis X-ray (TBX11K)                                 | 5880   | Hold-out method          | Yes | NR    | Human reader                                                          |
| Kadry et al, 2022        | VGG16, Fine Tree                                      | CXR | IEEE                                                        | 2100   | Hold-out method          | No  | NR    | Xpert MTB/RIF, Mycobacterium tuberculosis (MTB) culture, human reader |
| Kazemzadeh et al, 2023   | NR                                                    | CXR | Europe, India, South Africa, Zambia, MC, CH                 | 160187 | Hold-out method          | Yes | 2309  | Human reader                                                          |
| Margarat et al, 2022     | DBN-AMBO                                              | CXR | MC, CH                                                      | 662    | NR                       | No  | NR    | Human reader                                                          |

**Table S4. Accuracy measures reported by development studies.**

| Author and year        | AUC                                         | TP FP FN TN            | Sn                                                                                  | Sp                                                                                  | Accuracy                                                                                    | F1                                                                                       |
|------------------------|---------------------------------------------|------------------------|-------------------------------------------------------------------------------------|-------------------------------------------------------------------------------------|---------------------------------------------------------------------------------------------|------------------------------------------------------------------------------------------|
| Pasa et al, 2019       | 0.811(MC),<br>0.900(CH),<br>0.925(Belarus)  | NRNRNR NR              | NR                                                                                  | NR                                                                                  | 0.790(MC),<br>0.844(CH),<br>0.862(Belarus)                                                  | NR                                                                                       |
| Xie et al, 2020        | 0.977(MC),<br>0.941(CH),<br>0.993(FANXJU)   | NRNRNR NR              | 0.931(MC),<br>0.854(CH),<br>0.983(FANXJU)                                           | 0.923(MC),<br>0.951(CH),<br>0.962(FANXJU)                                           | 0.926(MC),<br>0.902(CH),<br>0.974(FANXJU)                                                   | NR                                                                                       |
| Ma et al, 2020         | 0.980                                       | 134 4 5 136            | 0.964                                                                               | 0.971                                                                               | 0.968                                                                                       | NR                                                                                       |
| Rajpurkar et al, 2020  | NR                                          | 31 9 58 16             | 0.67                                                                                | 0.870                                                                               | 0.790                                                                                       | NR                                                                                       |
| Oloko-Oba et al, 2021  | 0.940(MC),<br>0.960(CH)                     | NRNRNR NR              | 0.9813(MC),<br>0.9918(CH)                                                           | 0.9578(MC),<br>0.9621(CH)                                                           | 0.958(MC),<br>0.974(CH)                                                                     | NR                                                                                       |
| Mamalakis et al, 2021  | 0.950                                       | NRNRNR NR              | NR                                                                                  | NR                                                                                  | NR                                                                                          | 0.758                                                                                    |
| Rajakumar et al, 2021  | NR                                          | 587 20 21 585          | 0.9783                                                                              | 0.9667                                                                              | 0.973                                                                                       | NR                                                                                       |
| Wang et al, 2021       | 0.860,<br>0.780(validation)                 | NRNRNR NR              | 0.92,<br>0.75(validation)                                                           | 0.57,<br>0.63(validation)                                                           | 0.830,<br>0.690(validation)                                                                 | 0.890,<br>0.700(validation)                                                              |
| Showkatian et al, 2022 | 0.870                                       | NRNRNR NR              | 0.87                                                                                | NR                                                                                  | 0.870                                                                                       | 0.870                                                                                    |
| Zhou et al, 2022       | 0.998/0.56                                  | NRNRNR NR              | 0.798/0.844                                                                         | 0.996/0.934                                                                         | 0.948/0.931                                                                                 | NR                                                                                       |
| Rajaraman et al, 2021  | 0.954(CH),<br>0.964(MC)                     | NRNRNR NR              | 0.8805(CH),<br>0.8772(MC)                                                           | 0.8954(CH),<br>0.9687(MC)                                                           | 0.888(CH),<br>0.923(MC)                                                                     | 0.887(CH),<br>0.919(MC)                                                                  |
| Yan et al, 2021        | NR                                          | NRNRNR NR              | NR                                                                                  | NR                                                                                  | 0.970(NH, YH),<br>0.954(NH, HH),<br>0.983(NH, NIH)                                          | NR                                                                                       |
| Zhang et al, 2021      | 0.902                                       | NRNRNR NR              | NR                                                                                  | NR                                                                                  | 0.833                                                                                       | NR                                                                                       |
| Lakhani et al, 2017    | 0.980(AlexNet),<br>0.970(GoogLeNet)         | 71 4 6 69<br>75 1 6 69 | 0.920(AlexNet),<br>0.920(GoogLeNet)                                                 | 0.947(AlexNet),<br>0.987(GoogLeNet)                                                 | 0.933(AlexNet),<br>0.953(GoogLeNet)                                                         | NR                                                                                       |
| Han et al, 2021        | 0.965                                       | NRNRNR NR              | 0.96                                                                                | 0.971                                                                               | NR                                                                                          | NR                                                                                       |
| An et al, 2022         | NR                                          | NRNRNR NR              | 0.838                                                                               | 0.863                                                                               | 0.85                                                                                        | 0.848                                                                                    |
| Lee et al, 2021        | 0.830, 0.840                                | NRNRNR NR              | NR                                                                                  | NR                                                                                  | NR                                                                                          | NR                                                                                       |
| Khatibi et al, 2021    | 0.990(MC),<br>0.980(CH)                     | NRNRNR NR              | NR                                                                                  | NR                                                                                  | 0.993(MC),<br>0.992(CH)                                                                     | NR                                                                                       |
| Kim et al, 2020        | 0.880,<br>0.910                             | NRNRNR NR<br>NRNRNR NR | 0.85,<br>NR                                                                         | 0.76,<br>NR                                                                         | NR<br>NR                                                                                    | NR<br>NR                                                                                 |
| Feng et al, 2020       | 0.809                                       | NRNRNR NR              | 0.908                                                                               | 0.608                                                                               | 0.828                                                                                       | NR                                                                                       |
| Hwang et al, 2019      | 0.988                                       | NRNRNR NR              | 0.980                                                                               | 0.980                                                                               | NR                                                                                          | NR                                                                                       |
| Heo et al, 2019        | 0.908(I-CNN(VGG19)),<br>0.921(D-CNN(VGG19)) | NRNRNR NR              | 0.925(I-CNN(VGG19)),<br>0.925(D-CNN(VGG19))                                         | NR                                                                                  | 0.688(I-CNN(VGG19)),<br>0.748(D-CNN(VGG19))                                                 | NR                                                                                       |
| Aguiar et al, 2016     | NR                                          | 56 23 2 189            | 0.96                                                                                | 0.89                                                                                | NR                                                                                          | NR                                                                                       |
| Faruk et al, 2021      | NR                                          | 687 13 5 695           | NR (Xception),<br>NR (InceptionV3),<br>0.993(InceptionResNetV2),<br>NR(MobileNetV2) | NA (Xception),<br>NR (InceptionV3),<br>0.996(InceptionResNetV2),<br>NA(MobileNetV2) | 0.960(Xception),<br>0.980(Inception V3),<br>0.994(InceptionResNetV2),<br>0.979(MobileNetV2) | 0.950(Xception),<br>0.960(Inception V3),<br>0.990(InceptionResNetV2), 0.980(MobileNetV2) |

|                          |                                                             |                                           |                                                          |                                                          |                                                          |                                                   |
|--------------------------|-------------------------------------------------------------|-------------------------------------------|----------------------------------------------------------|----------------------------------------------------------|----------------------------------------------------------|---------------------------------------------------|
| Karki et al, 2021        | 0.810(InceptionV3),<br>0.810(Xception)                      | NRNRNR NR                                 | NR                                                       | NR                                                       | NR                                                       | NR                                                |
| Dasanayaka et al, 2021   | NR                                                          | 139 9 8 121<br>143 6 4 124<br>144 5 3 125 | 0.945(VGG16),<br>0.972(InceptionV3),<br>0.979(Ensemble), | 0.930(VGG16),<br>0.953(InceptionV3),<br>0.962(Ensemble), | 0.938(VGG16),<br>0.963(InceptionV3),<br>0.971(Ensemble), | NR                                                |
| Shen et al, 2010         | NR                                                          | NRNRNR NR                                 | NR                                                       | NR                                                       | 0.8235                                                   | NR                                                |
| Melendez et al, 2015     | 0.860(Zambia),<br>0.860(Tanzania),<br>0.910(The Gambia)     | NRNRNR NR                                 | NR                                                       | NR                                                       | NR                                                       | NR                                                |
| Sharma et al, 2021       | 0.990(Tree),<br>0.957(SVM),<br>0.998(Naïve Bayes)           | 14 7 3 12<br>10 3 7 16<br>14 1 7 18       | 0.82(Tree),<br>0.58(SVM),<br>0.82(Naïve Bayes)           | 0.63(Tree),<br>0.84(SVM),<br>0.95(Naïve Bayes)           | 0.722(Tree),<br>0.722(SVM),<br>0.889(Naïve Bayes)        | 0.979(Tree),<br>0.800(SVM),<br>0.896(Naïve Bayes) |
| Arzhaeva et al, 2009     | 0.810                                                       | NRNRNR NR                                 | NR                                                       | NR                                                       | NR                                                       | NR                                                |
| Jaeger et al, 2014       | 0.869                                                       | 43 15 15 65                               | 0.741                                                    | 0.813                                                    | 0.783                                                    | NR                                                |
| Chauhan et al, 2014      | 0.942,<br>0.956,<br>0.860,<br>0.918                         | NRNRNR NR                                 | 0.961,<br>0.885,<br>0.880,<br>0.920                      | 0.923,<br>0.962,<br>0.840,<br>0.880                      | 0.942,<br>0.923,<br>0.860,<br>0.900                      | 0.943,<br>0.920,<br>0.863,<br>0.902               |
| Hogeweg et al, 2015      | 0.868(RF50),<br>0.847(GB50),<br>0.741(LDA),<br>0.899(KNN13) | NRNRNR NR                                 | NR                                                       | NR                                                       | NR                                                       | NR                                                |
| Govindarajan et al, 2021 | NR                                                          | 57 0 1 80                                 | 0.993(ELM),                                              | 0.993(ELM),                                              | 0.993(ELM),                                              | 0.992(ELM),                                       |
| Acharya et al, 2022      | NR                                                          | 56 1 2 79                                 | 0.987(OSELM)                                             | 0.987(OSELM)                                             | 0.987(OSELM)                                             | 0.986(OSELM)                                      |
| Kadry et al, 2022        | 0.994                                                       | 220 36 36 2244                            | 0.918                                                    | 0.984                                                    | 0.969                                                    | NR                                                |
| Kazemzadeh et al, 2023   | NR                                                          | 446 4 3 447                               | 0.993                                                    | 0.991                                                    | 0.992                                                    | NR                                                |
| Margarat et al, 2022     | 0.890                                                       | 187220 25 804                             | 0.882                                                    | 0.785                                                    | NR                                                       | NR                                                |
|                          | NR                                                          | NRNRNR NR                                 | NR                                                       | 0.991(CH)<br>0.994(MC)                                   | 0.992(CH)<br>0.987(MC)                                   | NR                                                |

Abbreviation: CNN, convolutional neural networks; RCNN, regions with CNN features; CT, computed tomography; CXR, chest X-ray; TP, true positive; FP, false positive; FN, false negative; TN, true negative; MC, Montgomery Country; CH, Shenzhen Hospital, China; JSRT, Japanese Society of Radiology; FANXJU, First Affiliated Hospital of Xi'an Jiao Tong University; HIV, human immunodeficiency virus; ;NR, not reported; AUC, area under the receiver operating curve; Sn, sensitivity; Sp, specificity; MTB, Mycobacterium tuberculosis; NIH CXR, National Institute of Health ChestX-ray14 database; NIH CXR, National Institute of Health Chest X-ray15 database, NF, Nanfang Hospital; YH, yanling Hospital; HH, Haikou Hospital; CFFH, ClementiNo Fraga Filho Hospital; IEEE, Institute of Electrical and Electronics Engineers; DBN-AMBO, Deep Belief Network with Adaptive Monarch butterfly optimization.
